# Supplementary material for: Isolation and Quantification of Ginsenoside Rh23, a New Anti-Melanogenic Compound from the Leaves of Panax ginseng
Source: PubMed Central journal article supplement (PMC6017343; doi:10.3390/molecules23020267), 2018-01-29

## Supplementary Materials

$^1\text{H-NMR}$  data of ginsenoside Rh23

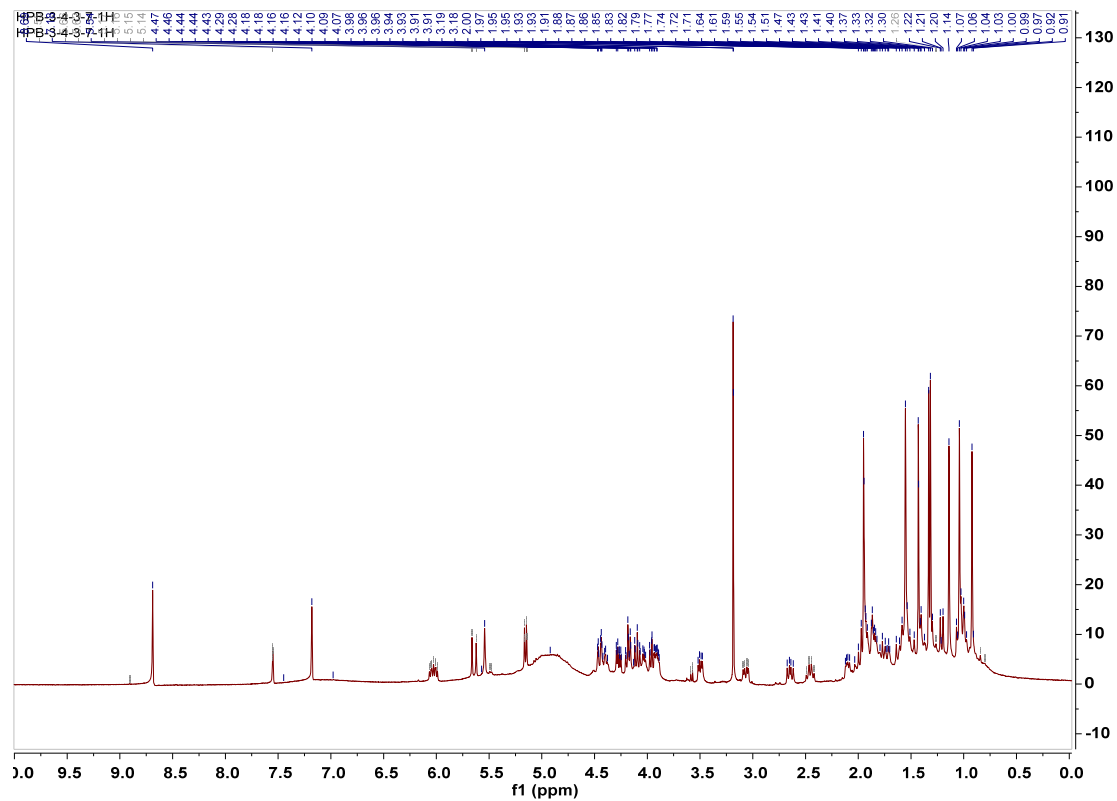

# <sup>13</sup>C-NMR data of ginsenoside Rh23

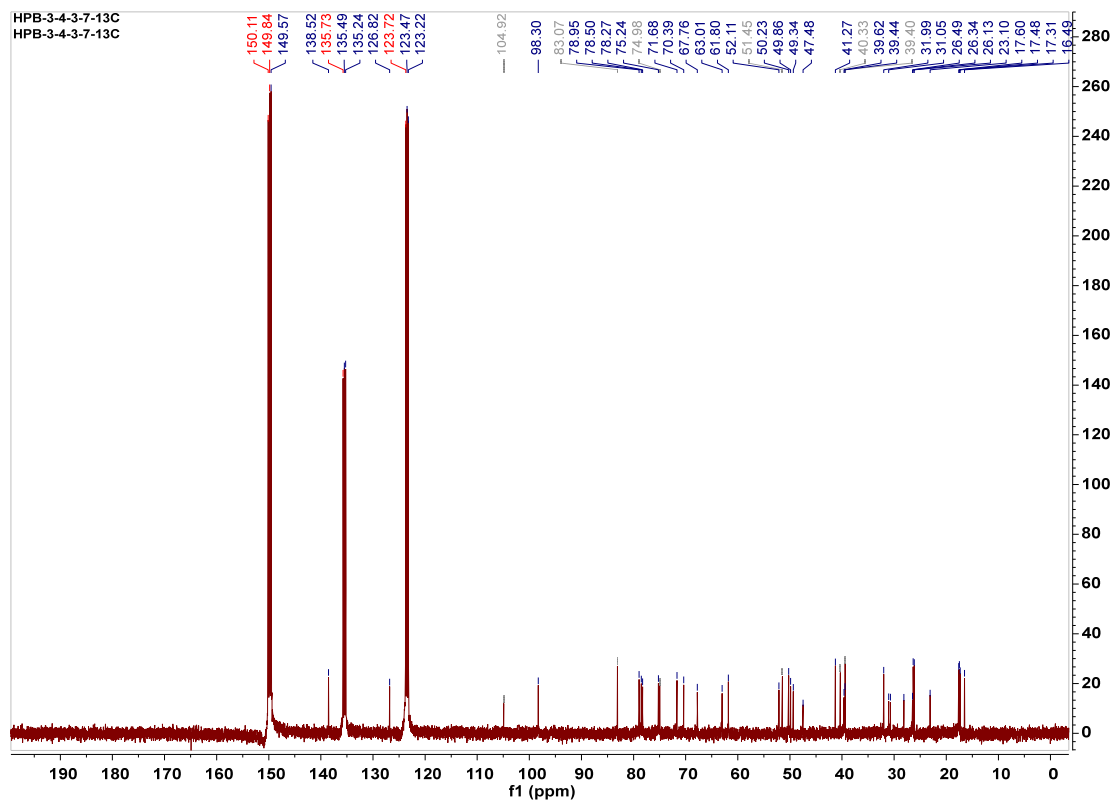

Supplement: molecules-23-00267-s001.pdf [file molecules-23-00267-s001.pdf]
